# Supplementary material for: Arterial endothelium creates a permissive niche for expansion of human cord blood hematopoietic stem and progenitor cells
Source: PubMed Central journal article supplement (PMC7429738; doi:10.1186/s13287-020-01880-8), 2020-08-14

# Supplementary Figure 2

**A**

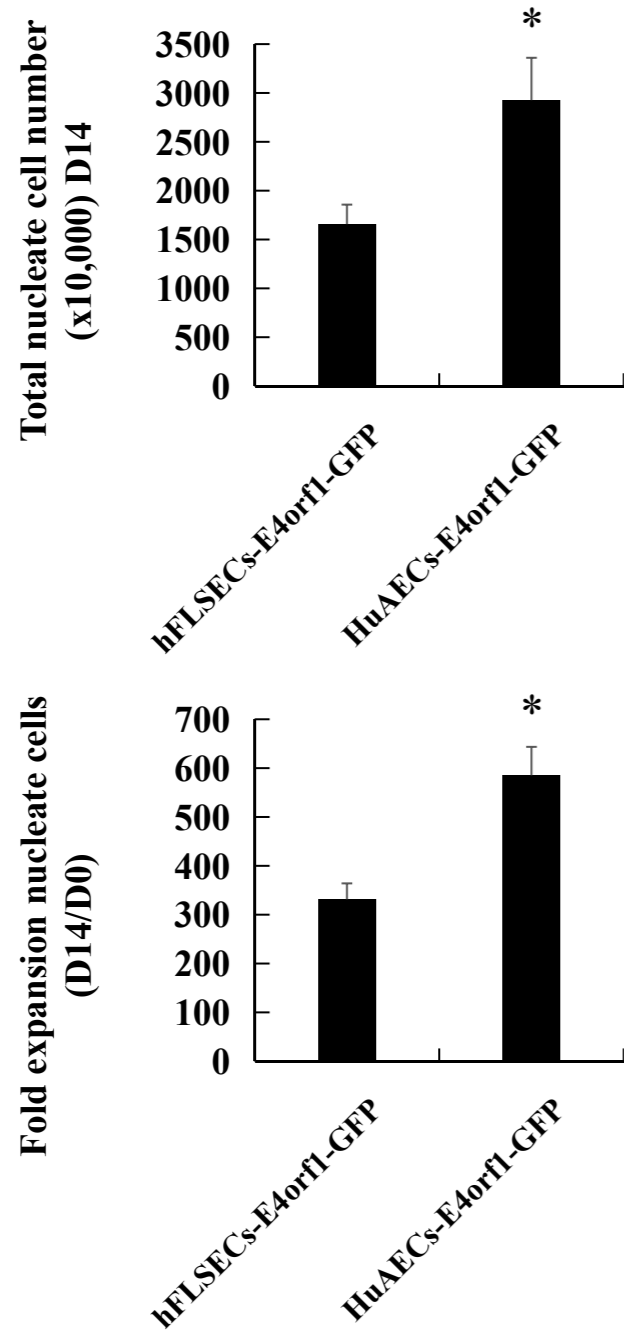

**C**

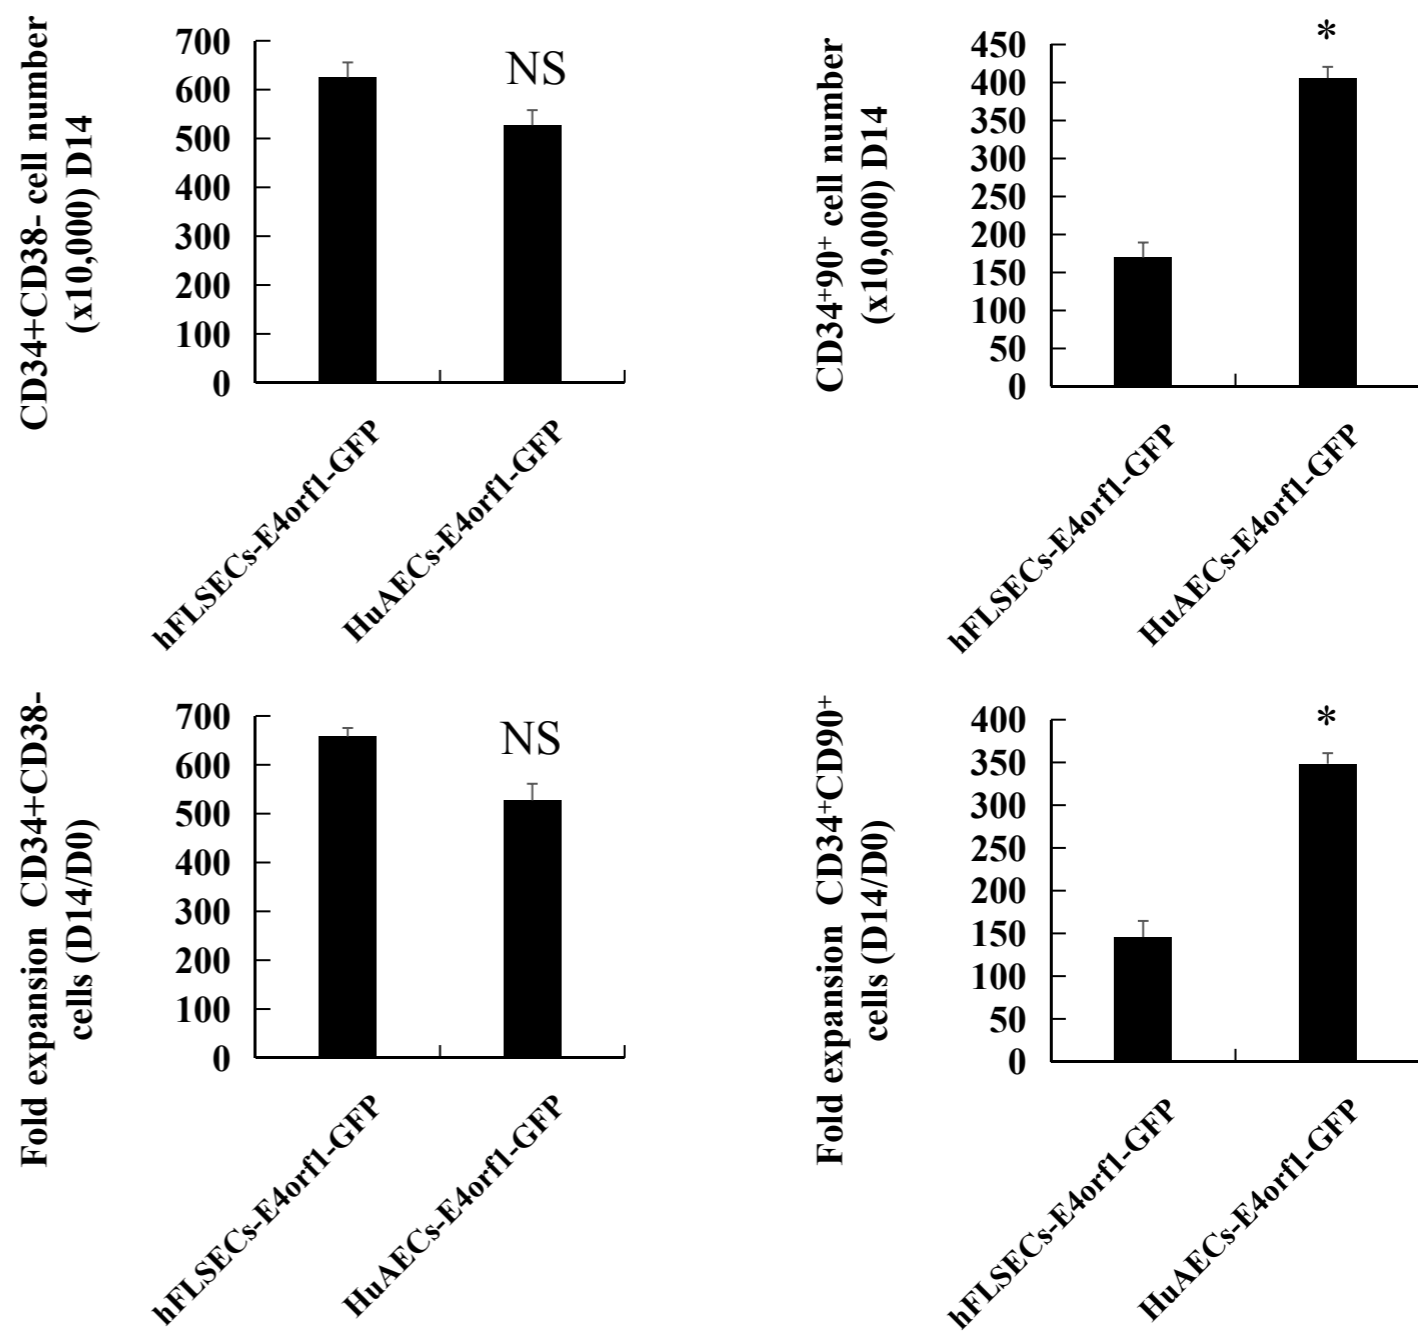

**B**

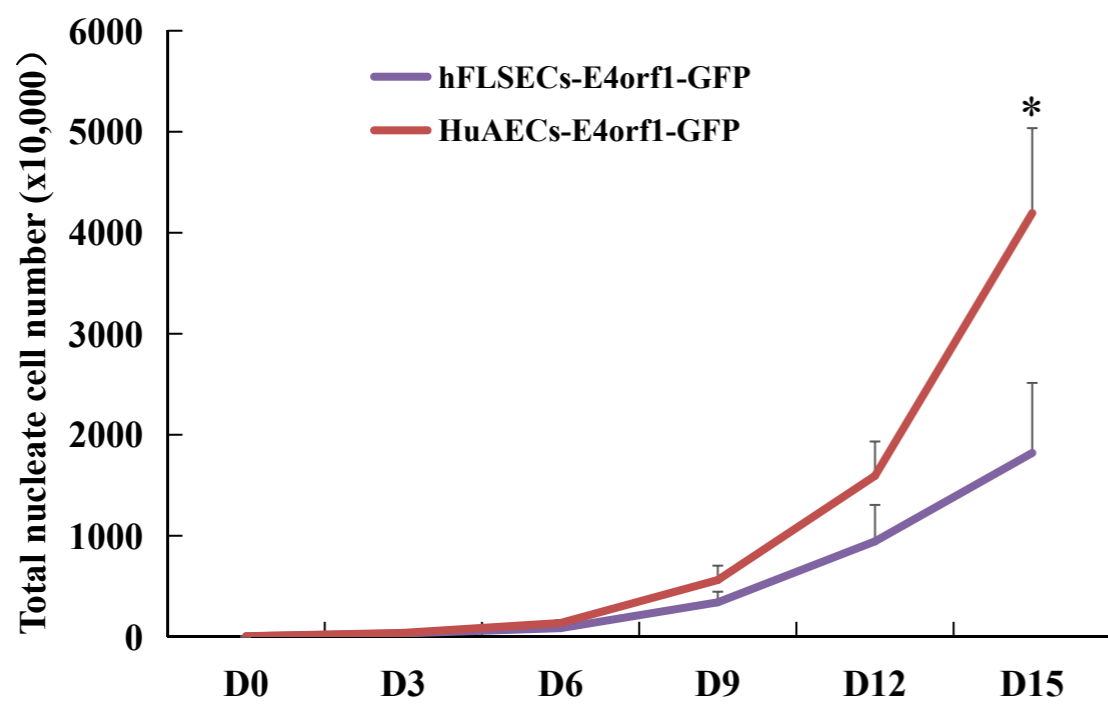

**D**

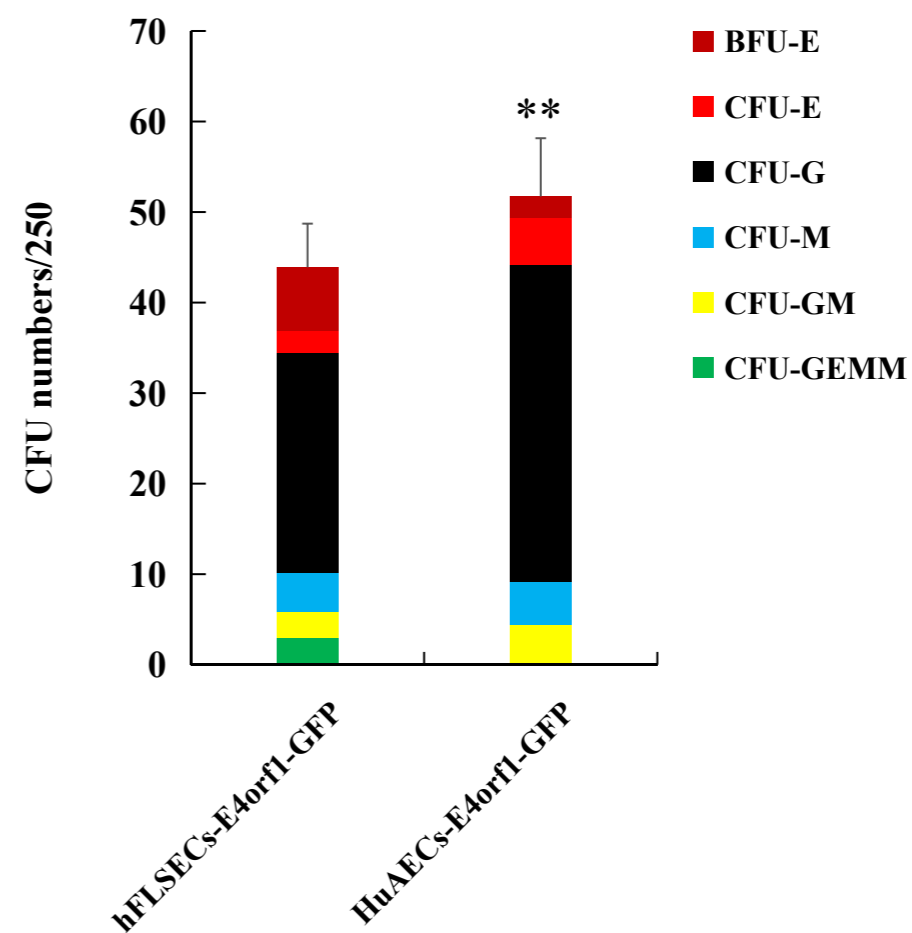

Supplement: 13287_2020_1880_MOESM2_ESM.pdf [file 13287_2020_1880_MOESM2_ESM.pdf]
